# Supplementary material
Source: PubMed Central journal article supplement (PMC3316656)
Supplement: supp_111.135541_corrigendum_Garcia-Dorado.pdf [file supp_111.135541_corrigendum_Garcia-Dorado.pdf]

Corrigendum for García-Dorado, *GENETICS* 190 (4) 1461-1476.

*GENETICS*, Vol 190, 1461-1476, April 2012, Copyright © 2012 Genetics Society of America.

#### CORRIGENDUM

In the article by A. García-Dorado entitled “Understanding and Predicting the Fitness Decline of Shrunken Populations: Inbreeding, Purging, Mutation, and Standard Selection” (*GENETICS*: 190, 1461–1476), on page 1463 the expression for the purged coancestry coefficient of individual **A** with itself contained a misprint and has been updated. The correct expression was used in the simulation programme, so that the misprint does not affect the validity of the results reported. The following expression:

$$\gamma(AA) = [1 + f(A)] [1 - 2d f(A)] / 2,$$

should read:

$$\gamma(AA) = [1 + g(A)] [1 - 2d f(A)] / 2.$$

Additionally, on page 1463 the equation in the following sentence has been updated. This change does not affect any part of results reported, as the equation is a previous poor approximation, given as part of an explanatory paragraph. The following sentence:

“...see Equation 1 in García-Dorado (2008), or the expression  $g_t = g \{1 - [(1 - f_t)(1 - d)]^t\}$  given a few lines below it. “

should read:

“...see Equation 1 in García-Dorado (2008), or the expression  $g_t = \hat{g} \{1 - [(1 - f_t)(1 - d)]^t\}$  given a few lines below it. “
